# Supplementary material for: Removal of Phosphate from Aqueous Solutions Using Chemically Synthesized Vaterite Polymorph of Porous Calcium Carbonate Nanoparticles under Optimized Conditions
Source: Hindawi journal article supplement (doi:10.1155/2020/3931910), 2020-09-15
Supplement: f1 [file 3931910.f1.docx]

**SUPPLEMENTARY DATA**

Table S01: Phosphate removal percentages at different contact times

| Contact | Initial | Final | Removal | Adsorption |
| --- | --- | --- | --- | --- |
| time | [Phosphate] | [Phosphate] | percentage of | capacity |
| (min) | (mg/L) | (mg/L) | Phosphate | (mg/g) |
|  |  |  | (%) |  |
|  |  |  |  |  |
| 1 | 4.293 | 1.876 | 56.3 | 1.2085 |
| 5 | 4.293 | 1.170 | 72.8 | 1.5615 |
| 15 | 4.293 | 1.145 | 73.3 | 1.5740 |
| 30 | 4.293 | 1.081 | 74.8 | 1.6060 |
| 60 | 4.293 | 1.106 | 74.2 | 1.5935 |
| 120 | 4.293 | 1.058 | 75.4 | 1.6175 |

Table S02: Phosphate removal percentages at different VPCCNPs dosages

|  | PCCNPs | Initial | Final | Adsorption | Removal |
| --- | --- | --- | --- | --- | --- |
|  | dosage | [Phosphate] | [Phosphate] | capacity | percentage of |
|  | (g) | (mg/L) | (mg/L) | (mg/g) | Phosphate% |
|  | 0.025 | 4.293 | 3.172 | 2.242 | 26.1 |
|  | 0.050 | 4.293 | 1.911 | 2.732 | 55.5 |
|  | 0.100 | 4.293 | 1.003 | 1.645 | 76.6 |
|  | 0.150 | 4.293 | 0.487 | 1.269 | 88.7 |
|  | 0.200 | 4.293 | 0.000 | 1.073 | 100.0 |
|  | 0.250 | 4.293 | 0.000 | 0.858 | 100.0 |

Table S03: Phosphate removal percentages at different pH values

|  | pH of the  phosphate | Initial  [Phosphate] | Final  [Phosphate] | Adsorption  capacity | Removal  percentage of |
| --- | --- | --- | --- | --- | --- |
|  | solution | (mg/L) | (mg/L) | (mg/g) | Phosphate % |
|  |  |  |  |  |  |
|  | 5.11 | 4.293 | 0.908 | 1.128 | 78.9 |
|  | 6.02 | 4.293 | 0.884 | 1.136 | 79.7 |
|  | 6.91 | 4.293 | 0.784 | 1.170 | 81.7 |
|  | 8.20 | 4.293 | 0.604 | 1.230 | 85.8 |
|  | 9.21 | 4.293 | 0.596 | 1.232 | 86.1 |
|  | 10.00 | 4.293 | 0.722 | 1.190 | 83.4 |
|  | 11.98 | 4.293 | 0.000 | 1.431 | 100.0 |

Table S04: Phosphate removal percentages at different concentrations

| Initial phosphate | Final | Adsorption | Removal |
| --- | --- | --- | --- |
| concentration | [Phosphate] | capacity | percentage of |
| (mg/L) | (mg/L) | (mg/g) | Phosphate % |
|  |  |  |  |
| 2.0 | 0.000 | 0.667 | 100.0 |
| 4.3 | 0.604 | 1.232 | 85.9 |
| 10.1 | 1.876 | 2.741 | 81.5 |
| 15.0 | 5.184 | 3.272 | 65.5 |
| 21.3 | 15.812 | 1.829 | 25.8 |
| 29.5 | 24.398 | 1.701 | 17.2 |
| 40.6 | 35.663 | 1.646 | 12.1 |
| 52.6 | 47.083 | 1.839 | 10.5 |
| 60.4 | 54.820 | 1.860 | 9.2 |
| 76.6 | 71.067 | 1.844 | 7.2 |

Table S05: pH change during the treatment


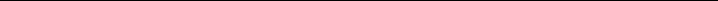


|  | Contact time (min) | pH during the treatment |
| --- | --- | --- |
|  |  |  |
|  | 2 | 8.01 |
|  | 4 | 8.06 |
|  | 6 | 8.34 |
|  | 8 | 8.31 |
|  | 10 | 8.42 |
|  | 12 | 8.31 |

Table S06: Parameters of kinetic study

| Time (t) | Remaining | Adsorbed | ln(qt) | 1/qt | Log | t/qt (min |
| --- | --- | --- | --- | --- | --- | --- |
| (min) | Phosphate | phosphate |  | (g/mg) | (qe-qt) | g/mg) |
|  | concentration | amount (qt) |  |  |  |  |
|  | (mg/L) | (mg/g) |  |  |  |  |
|  |  |  |  |  |  |  |
| 0 | 0.84 | 0.392 | -0.9356 | 2.5489 | -0.8973 | 0.0000 |
| 5 | 0.62 | 0.466 | -0.7636 | 2.1459 | -1.2757 | 10.7296 |
| 10 | 0.56 | 0.487 | -0.7202 | 2.0548 | -1.4903 | 20.5479 |
| 15 | 0.56 | 0.487 | -0.7195 | 2.0534 | -1.4949 | 30.8008 |
| 20 | 0.53 | 0.495 | -0.7032 | 2.0202 | -1.6198 | 40.4040 |
| 25 | 0.49 | 0.510 | -0.6740 | 1.9621 | -2.0300 | 47.0896 |
| 30 | 0.00 | 0.672 | -0.3970 | 1.4874 | - | 44.6207 |
| 35 | 0.52 | 0.499 | -0.6958 | 2.0053 | -1.6918 | 68.1818 |
| 40 | 0.50 | 0.507 | -0.6786 | 1.9711 | -1.9331 | 78.8436 |
| 60 | 0.46 | 0.519 | -0.6565 | 1.9280 | -3.4771 | 115.6812 |


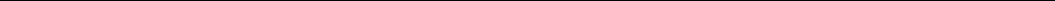


*Equilibrium concentration (qe) - 0.519*

Table S07: Phosphate removal with different concentrations and parameters for Langmuir and Freundlich isotherms

|  | Initial | Final | Adsorbed | Removal | qe | Ce/qe | Log | log |
| --- | --- | --- | --- | --- | --- | --- | --- | --- |
|  | [ − ] | [ − ] | Amount | (%) | (mg/g) | (g/L) | (Ce) | (qe) |
|  | (Co) | (Ce) |  |  |  |  |  |  |
|  | (mg/L) | (mg/L) |  |  |  |  |  |  |
|  | 2.02 | 0.00 | 2.02 | 100.00 | 0.67 | 0.00 |  | -0.17 |
|  | 4.29 | 0.60 | 3.69 | 85.93 | 1.23 | 0.49 | -0.22 | 0.09 |
|  | 10.13 | 1.88 | 8.25 | 81.47 | 2.75 | 0.68 | 0.27 | 0.44 |
|  | 15.02 | 5.18 | 9.84 | 65.49 | 3.28 | 1.58 | 0.71 | 0.52 |
|  | 21.30 | 15.81 | 5.49 | 25.77 | 1.83 | 8.64 | 1.20 | 0.26 |
|  | 29.46 | 24.40 | 5.06 | 17.17 | 1.69 | 14.47 | 1.39 | 0.23 |
|  | 40.58 | 35.66 | 4.92 | 12.12 | 1.64 | 21.76 | 1.55 | 0.21 |
|  | 52.61 | 47.08 | 5.52 | 10.50 | 1.84 | 25.57 | 1.67 | 0.27 |
|  | 60.37 | 54.82 | 5.55 | 9.19 | 1.85 | 29.63 | 1.74 | 0.27 |
|  | 76.60 | 71.07 | 5.53 | 7.22 | 1.84 | 38.53 | 1.85 | 0.27 |

Table S08: Contact time optimization

| Contact |  | Final concentration (mg/L) | |  |  |
| --- | --- | --- | --- | --- | --- |
| time (min) |  |  |  |  |  |
| Replicate 1 | Replicate 2 | Replicate 3 | Mean value | SD |
|  |  |  |  |  |  |
| 1 | 1.786 | 1.944 | 1.898 | 1.876 | 0.066 |
|  |  |  |  |  |  |
| 5 | 1.178 | 1.164 | 1.168 | 1.170 | 0.006 |
|  |  |  |  |  |  |
| 15 | 1.139 | 1.153 | 1.143 | 1.145 | 0.006 |
|  |  |  |  |  |  |
| 30 | 1.064 | 1.088 | 1.091 | 1.081 | 0.012 |
|  |  |  |  |  |  |
| 60 | 1.092 | 1.111 | 1.115 | 1.106 | 0.010 |
|  |  |  |  |  |  |
| 120 | 1.058 | 1.053 | 1.063 | 1.058 | 0.004 |
|  |  |  |  |  |  |

Table S09: Dosage optimization

| Dosage (g) |  | Final concentration (mg/L) | |  |  |
| --- | --- | --- | --- | --- | --- |
|  |  |  |  |  |  |
|  | Replicate 1 | Replicate 2 | Replicate 3 | Mean value | SD |
| 0.025 | 3.170 | 3.181 | 3.165 | 3.172 | 0.007 |
|  |  |  |  |  |  |
| 0.050 | 1.899 | 1.932 | 1.902 | 1.911 | 0.015 |
|  |  |  |  |  |  |
| 0.100 | 1.008 | 1.011 | 0.990 | 1.003 | 0.009 |
|  |  |  |  |  |  |
| 0.150 | 0.480 | 0.491 | 0.490 | 0.487 | 0.005 |
|  |  |  |  |  |  |
| 0.200 | 0.000 | 0.000 | 0.000 | 0.000 | 0.000 |
|  |  |  |  |  |  |
| 0.250 | 0.000 | 0.000 | 0.000 | 0.000 | 0.000 |
|  |  |  |  |  |  |

Table S10: pH optimization

|  | |  |  |  |  |
| --- | --- | --- | --- | --- | --- |
| pH |  | Final concentration (mg/L) | |  |  |
|  |  |  |  |  |  |
|  | Replicate 1 | Replicate 2 | Replicate 3 | Mean value | SD |
|  |  |  |  |  |  |
| 5.11 | 0.912 | 0.901 | 0.911 | 0.908 | 0.005 |
|  |  |  |  |  |  |
| 6.02 | 0.891 | 0.863 | 0.898 | 0.884 | 0.015 |
|  |  |  |  |  |  |
| 6.91 | 0.768 | 0.782 | 0.802 | 0.784 | 0.014 |
|  |  |  |  |  |  |
| 8.20 | 0.598 | 0.610 | 0.604 | 0.604 | 0.005 |
|  |  |  |  |  |  |
| 9.21 | 0.589 | 0.598 | 0.601 | 0.596 | 0.005 |
|  |  |  |  |  |  |
| 10.00 | 0.701 | 0.731 | 0.734 | 0.722 | 0.015 |
|  |  |  |  |  |  |
| 11.98 | 0.000 | 0.000 | 0.000 | 0.000 | 0.000 |
|  |  |  |  |  |  |

Table S11: Initial concentration optimization*

| Concentration |  | Final concentration (mg/L) | | | |  |  |
| --- | --- | --- | --- | --- | --- | --- | --- |
| (mg/L) |  |  |  |  |  |  |  |
| Replicate |  | Replicate | Replicate |  | Mean | SD |
|  | 1 |  | 2 | 3 |  | value |  |
| 2.0 | 0.000 |  | 0.000 | 0.000 |  | 0.000 | 0.000 |
|  |  |  |  |  |  |  |  |
| 4.3 | 0.589 |  | 0.610 | 0.604 |  | 0.604 | 0.009 |
|  |  |  |  |  |  |  |  |
| 10.1 | 1.868 |  | 1.879 | 1.881 |  | 1.876 | 0.006 |
|  |  |  |  |  |  |  |  |
| 15.0 | 5.173 |  | 5.190 | 5.189 |  | 5.184 | 0.008 |
|  |  |  |  |  |  |  |  |
| 21.3 | 15.800 |  | 15.848 | 15.788 |  | 15.812 | 0.026 |
|  |  |  |  |  |  |  |  |
| 29.5 | 24.398 |  | 24.445 | 24.351 |  | 24.398 | 0.038 |
|  |  |  |  |  |  |  |  |
| 40.6 | 35.701 |  | 36.001 | 35.287 |  | 35.663 | 0.293 |
|  |  |  |  |  |  |  |  |
| 52.6 | 47.008 |  | 46.978 | 47.263 |  | 47.083 | 0.128 |
|  |  |  |  |  |  |  |  |
| 60.4 | 54.910 |  | 54.730 | 54.820 |  | 54.820 | 0.073 |
|  |  |  |  |  |  |  |  |
| 76.6 | 71.103 |  | 70.896 | 71.202 |  | 71.067 | 0.127 |
|  |  |  |  |  |  |  |  |

**Same data were used in the isotherm studies*

Table S12. pH change during the treatment

| Contact |  | pH change during the treatment | | | |  |  |
| --- | --- | --- | --- | --- | --- | --- | --- |
| time (min) |  |  |  |  |  |  |  |
| Replicate 1 |  | Replicate 2 | Replicate 3 |  | Mean value | SD |
|  |  |  |  |  |  |  |  |
| 2 | 8.11 |  | 8.02 | 7.91 |  | 8.01 | 0.08 |
|  |  |  |  |  |  |  |  |
| 4 | 8.09 |  | 8.15 | 7.94 |  | 8.06 | 0.09 |
|  |  |  |  |  |  |  |  |
| 6 | 8.41 |  | 8.31 | 8.30 |  | 8.34 | 0.05 |
|  |  |  |  |  |  |  |  |
| 8 | 8.36 |  | 8.27 | 8.31 |  | 8.31 | 0.04 |
|  |  |  |  |  |  |  |  |
| 10 | 8.44 |  | 8.44 | 8.38 |  | 8.42 | 0.03 |
|  |  |  |  |  |  |  |  |
| 12 | 8.36 |  | 8.32 | 8.24 |  | 8.31 | 0.05 |
|  |  |  |  |  |  |  |  |
